# Supplementary material
Source: PubMed Central journal article supplement (PMC6650740)
Supplement: baADV2019000201-suppl1.pdf [file baADV2019000201-suppl1.pdf]

## Supplemental Table 1. Manufacturing Characteristics

| P#             | Time-to-clinical Freeze (days) | Time-to-Infusion (days) | Dose                                |
|----------------|--------------------------------|-------------------------|-------------------------------------|
| ACTCAT         |                                |                         |                                     |
| P2891          | 57                             | 68                      | 5x10 <sup>6</sup> /m <sup>2</sup>   |
| P3010          | 50                             | 63                      | 5x10 <sup>6</sup> /m <sup>2</sup>   |
| P3275          | 55                             | 85                      | 1x10 <sup>7</sup> /m <sup>2</sup>   |
| P3317          | 111                            | 146                     | 1x10 <sup>7</sup> /m <sup>2</sup>   |
| P3457          | 42                             | 62                      | 1.5x10 <sup>7</sup> /m <sup>2</sup> |
| P3531          | 55                             | 97                      | 1.5x10 <sup>7</sup> /m <sup>2</sup> |
| P3555          | 49                             | 126                     | 1.5x10 <sup>7</sup> /m <sup>2</sup> |
| P3923          | 63                             | 87                      | 2.5x10 <sup>7</sup> /m <sup>2</sup> |
| P3626          | 63                             | 434                     | 2.5x10 <sup>7</sup> /m <sup>2</sup> |
| P3869          | 72                             | n/a                     | n/a                                 |
| Median         | 56                             | 87                      |                                     |
| ACTCAT2        |                                |                         |                                     |
| P0003          | 40                             | n/a                     | n/a                                 |
| P0006          | 67                             | n/a                     | n/a                                 |
| P0020          | 49                             | 221                     | 5x10 <sup>6</sup> /m <sup>2</sup>   |
| P0035          | 51                             | 71                      | 5x10 <sup>6</sup> /m <sup>2</sup>   |
| P0039          | 54                             | 48                      | 5x10 <sup>6</sup> /m <sup>2</sup>   |
| P0059          | 49                             | n/a                     | n/a                                 |
| P0067          | 44                             | 240                     | 1x10 <sup>7</sup> /m <sup>2</sup>   |
| P0123          | 49                             | 69                      | 1x10 <sup>7</sup> /m <sup>2</sup>   |
| Median         | 49                             | 71                      |                                     |
| Overall Median | 52.5                           | 87                      |                                     |

# Supplemental Fig 1a

## P0020: Unique clonotype frequency

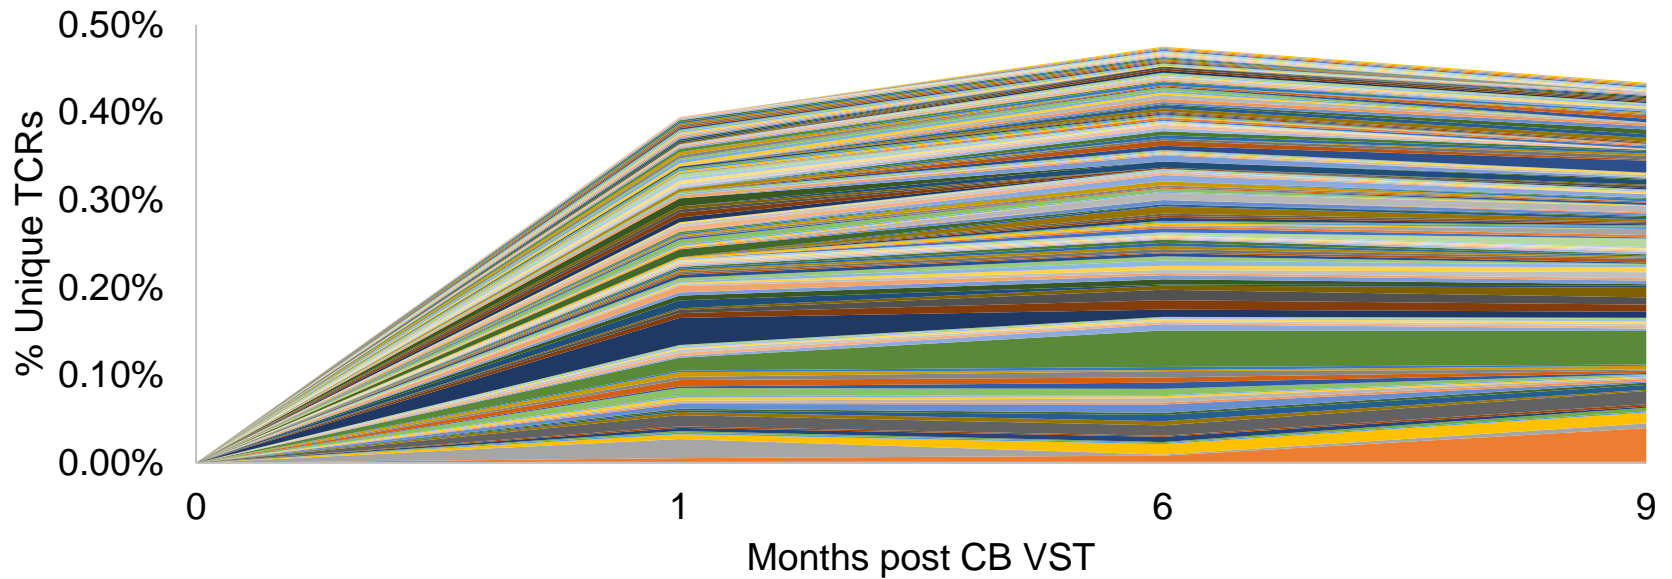

- |                   |                    |                   |                    |                   |
|-------------------|--------------------|-------------------|--------------------|-------------------|
| ■ CASSFNSYEQYF    | ■ CASSLGTGGYEQYF   | ■ CSVDRVNTEAFF    | ■ CASSPTGNTEAFF    | ■ CASSLGTSYNEQFF  |
| ■ CASSFRNTEAFF    | ■ CASSQGQNYGYTF    | ■ CASSYGETQYF     | ■ CASSTGELFF       | ■ CASSQDGNQPQHF   |
| ■ CASSLRLAGGYEQYF | ■ CASSLTGYEQYF     | ■ CASSLAGGGYTF    | ■ CASSLRTGNTGELFF  | ■ CASSGQGAGNTIYF  |
| ■ CASSLAPNTEAFF   | ■ CASSLTGQGFYEQYF  | ■ CASSLRGNTTEAFF  | ■ CASSFQETQYF      | ■ CASSLDTYEQYF    |
| ■ CASSDRNTEAFF    | ■ CASSLGLAGGQETQYF | ■ CASSLGLAATDTQYF | ■ CASSNSYEQYF      | ■ CASSLGNTIYF     |
| ■ CASRTSGYNEQFF   | ■ CASSVPGSSYEQYF   | ■ CASSLESSYNSPLHF | ■ CASSGDSNQPQHF    | ■ CASSLGGNEQFF    |
| ■ CSALQGSYNSPLHF  | ■ CASSLTGAGGYTF    | ■ CASSLRGNQPQHF   | ■ CASSLGGYEQYF     | ■ CASSDRGYGYTF    |
| ■ CASSLAGRNTEAFF  | ■ CASSLGGYGYTF     | ■ CASSLTGPNYGYTF  | ■ CASSSYEQYF       | ■ CASSSTSGGANEQFF |
| ■ CASSPTGGTEAFF   | ■ CSARTSGRNEQFF    | ■ CASSYTYEQYF     | ■ CASSLGSYEQYF     | ■ CASSLLAGETQYF   |
| ■ CASSSQETQYF     | ■ CASSQDGNYGTYF    | ■ CASSDSYEQYF     | ■ CASSQGLAGDTQYF   | ■ CASSLAGNTGELFF  |
| ■ CASSLQANYGYTF   | ■ CASSQERYEQYF     | ■ CSVEDNYGYTF     | ■ CSARQNTTEAFF     | ■ CASSRNTEAFF     |
| ■ CASSPSGNYGYTF   | ■ CASSYSGNTEAFF    | ■ CASSRGGNQPQHF   | ■ CASSVYNEQFF      | ■ CATSRDTSYEQYF   |
| ■ CSARDRNQPQHF    | ■ CASSYPTDTQYF     | ■ CASSLGGHEQYF    | ■ CASSLGRNTEAFF    | ■ CASSIWGSGNTIYF  |
| ■ CASSFRETEQYF    | ■ CASSYSSYEQYF     | ■ CASSLGTSEYQYF   | ■ CASSLGRNTEAFF    | ■ CASSPDSYEQYF    |
| ■ CASSTGSSGNTIYF  | ■ CASSLGTNTEAFF    | ■ CASSRLAGTDTQYF  | ■ CASSPGQDYGYTF    | ■ CASSLERGGTDTQYF |
| ■ CASSLYGYTF      | ■ CASSESSTDTQYF    | ■ CASSLAGGGYEQYF  | ■ CASSQVTGGYGYTF   | ■ CAWSRNTEAFF     |
| ■ CSASSPNTEAFF    | ■ CASRPSGRGETQYF   | ■ CASSLGTNEQFF    | ■ CASSQGTGTGNTIYF  | ■ CASSLDRGYEQYF   |
| ■ CASSLSTEAFF     | ■ CASSQDRGYEQYF    | ■ CASSPQNQPQHF    | ■ CASSYRAKNIQYF    | ■ CASSLQGGNIQYF   |
| ■ CASSLGYNSPLHF   | ■ CASSPSYNEQFF     | ■ CSARTSGNTGELFF  | ■ CASSYSGDGYTF     | ■ CASSLERGGTDTQYF |
| ■ CASSSGSTDTQYF   | ■ CASSGQGYGYTF     | ■ CASSLGGGGTEAFF  | ■ CSARDSSYEQYF     | ■ CASSLAGELFF     |
| ■ CASSTGGTEAFF    | ■ CASSLDNSGNTIYF   | ■ CASSEGQNTTEAFF  | ■ CASSYGLAGGTDQYF  | ■ CASSLTSGGTDTQYF |
| ■ CASRDNTGELFF    | ■ CASSLGNQPQHF     | ■ CASSLTGGTDTQYF  | ■ CASSPENTEAFF     | ■ CASSIETQYF      |
| ■ CASSLTGSYEQYF   | ■ CASSLGPDTQYF     | ■ CASSPRLAGQETQYF | ■ CASSQEETQYF      | ■ CSVEGNTEAFF     |
| ■ CASSLAGSYNEQFF  | ■ CAIRGTDQYF       | ■ CASSFQGNQPQHF   | ■ CASSLLAGGPSETQYF | ■ CASSLAGETQYF    |
| ■ CASSPSSYEQYF    | ■ CASSRQTGELFF     | ■ CASSLKRETQYF    | ■ CASSLGGETQYF     | ■ CASSLSSNQPQHF   |
| ■ CASSLTGNQPQHF   | ■ CASSLGTSTYEQYF   | ■ CASSLGQETQYF    | ■ CASSPDRGNYGYTF   | ■ CASSGQGANYYGYTF |

# Supplemental Fig 1b

P3555: Unique clonotype frequency

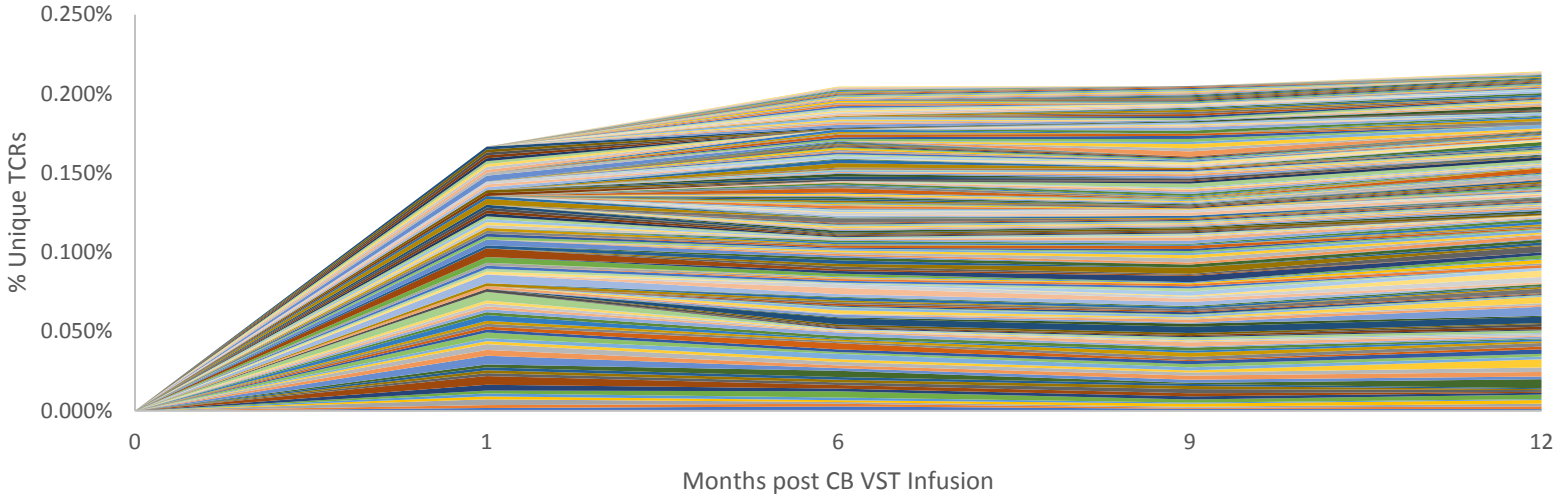

- |                   |                   |                   |                    |                  |
|-------------------|-------------------|-------------------|--------------------|------------------|
| ■ CASSLGAGELFF    | ■ CASSLVTDTQYF    | ■ CASSRNTEAFF     | ■ CASSPRDSSYEQYF   | ■ CASSVGQGPYEQYF |
| ■ CASSPSYEQYF     | ■ CASSSGNTEAFF    | ■ CASSYGETQYF     | ■ CASSLGGYNEQFF    | ■ CASSIQGNQPQHF  |
| ■ CASSPRQGMNTEAFF | ■ CASRGNTEAFF     | ■ CASSPRGSYEQYF   | ■ CASSLDRGTEAFF    | ■ CASSPGQSYEQYF  |
| ■ CASSLGQTYEQYF   | ■ CASSLTGLNTEAFF  | ■ CASSRTGNTEAFF   | ■ CASSPGLNTEAFF    | ■ CASSLGDYGYTF   |
| ■ CASSEGYEQYF     | ■ CASSPLAGGTDQYF  | ■ CASSGSSYEQYF    | ■ CASSLGTSYEQYF    | ■ CASSLAGGNTEAFF |
| ■ CASSPQGGTEAFF   | ■ CASSRGQGTDTQYF  | ■ CASSVGTSSYNEQFF | ■ CASSQDYNEQFF     | ■ CASSVGADTQYF   |
| ■ CASSPGPYSNQPQHF | ■ CASSSSGYNEQFF   | ■ CASSLGASYEQYF   | ■ CASSQGQGNQPQHF   | ■ CASSLGGNYGYTF  |
| ■ CASSRSSGANVLTFF | ■ CASSLGSNTIYF    | ■ CASSLAENTEAFF   | ■ CASSRRDSYEQYF    | ■ CASSLRNEQFF    |
| ■ CASRNTGELFF     | ■ CASSFPGGETQYF   | ■ CASSLNEQFF      | ■ CASSLSSGANVLTFF  | ■ CASSLVGDTQYF   |
| ■ CASSHTGELFF     | ■ CASSGTGYEQYF    | ■ CASSLGRGTEAFF   | ■ CASSLVRNTEAFF    | ■ CASSLSGTEAFF   |
| ■ CASSLGGSYNEQFF  | ■ CASSLGQAYEQYF   | ■ CASSSGDYGYTF    | ■ CASSVGTGSYEQYF   | ■ CASSLAGSTGELFF |
| ■ CASSYSGNTEAFF   | ■ CASSQTSGGYNEQFF | ■ CASSSGQGSYEQYF  | ■ CASSYSTSGSTDTQYF | ■ CASSLLGNTEAFF  |
| ■ CASSLSGANVLTFF  | ■ CASSPRGGETQYF   | ■ CASSLRGNEQFF    | ■ CASSLSGSNQPQHF   | ■ CASRGETQYF     |

# Supplemental Fig 1c

## P3317: Unique clonotype frequency

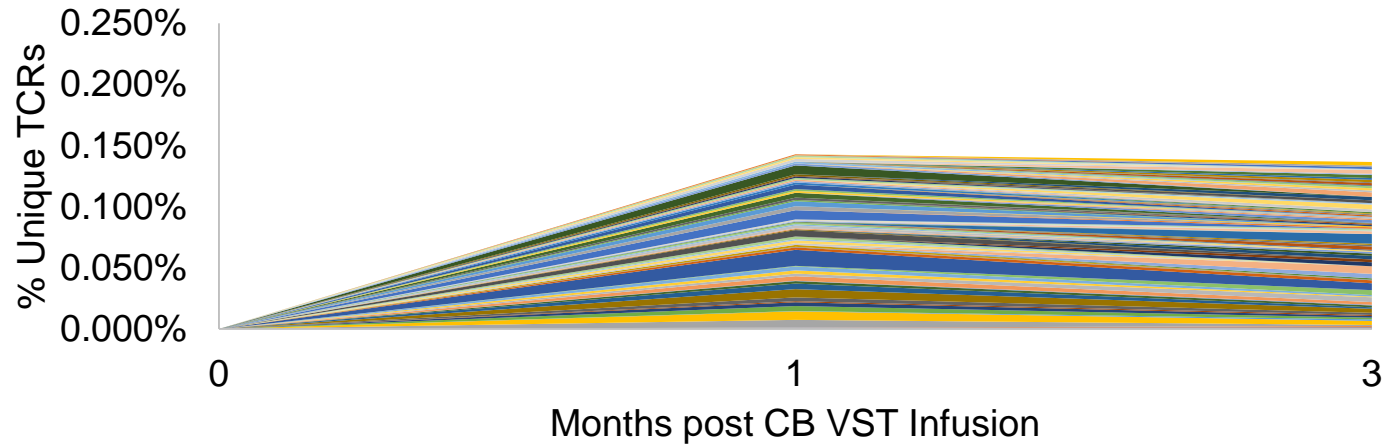

■ CASSPRTGYEQYF  
■ CASSLTVNTGELFF  
■ CASSPGQGSYEQYF  
■ CASSYGGGTEAFF  
■ CASSGTQETQYF  
■ CASSPGPYGYTF  
■ CASSLQGGYGTYF  
■ CASSWDNEKLFF  
■ CASSIGGGANVLTF  
■ CASSLTGGDTIYF  
■ CASSLELASYEQYF  
■ CASSVGEDTQYF  
■ CASGGTDTQYF  
■ CASSLGSAYEQYF  
■ CASSGTSGGADTQYF  
■ CASSSGTGEETQYF  
■ CSAKGVGTQYF  
■ CASSLSRSTDTQYF  
■ CASSPQGTSTDTQYF  
■ CASSYSSGSSYEQYF  
■ CASGLGGYEQYF  
■ CASSPRDGSYEQYF  
■ CASSPTSGAYNEQFF  
■ CASSLVGYEQYF  
■ CASSIQGYEQYF  
■ CASSPGQGETQYF  
■ CASSWTGEGYTF  
■ CASSLDGNQPQHF

■ CASSPGTSGGYEQYF  
■ CASSLTGGTGELFF  
■ CASSLRMNTAEFF  
■ CASSLAGVQETQYF  
■ CASSQDRETQYF  
■ CASSLTGAGANVLTF  
■ CASSLTGDGYTF  
■ CASSYGGMNTAEFF  
■ CASSFGTLNTEAFF  
■ CASSLTRETQYF  
■ CASSFRDNTEAFF  
■ CASSSENTGELFF  
■ CASSRSGGAAGELFF  
■ CASSLGLREQFF  
■ CASSLGGGAEETQYF  
■ CASSVEGGTDTQYF  
■ CASSLSTGNTAEFF  
■ CASSQGGGADTQYF  
■ CSAPTPYEQYF  
■ CASSQGRADTQYF  
■ CASSLQGGRYGYTF  
■ CASSLQGGDTQYF  
■ CASSQEYNEQFF  
■ CASSLTRGNQPQHF  
■ CASSRNQPQHF  
■ CASSFGGGSYEQYF  
■ CASSFPNTEAFF

■ CASSLGFTDTQYF  
■ CASSLTPYNEQFF  
■ CSASGGADTQYF  
■ CASGGNTEAFF  
■ CASSLAGAYEQYF  
■ CASSPTGAKNIQYF  
■ CSAGTSGTDTQYF  
■ CASSLGESTDTQYF  
■ CASSLRGGPYEQYF  
■ CASSYSQETQYF  
■ CASSPRGGETDTQYF  
■ CASSWDRGTDQYF  
■ CASSLLAGDTGELFF  
■ CASSRDYEQYF  
■ CASSPGLNTGELFF  
■ CASSFGGATDTQYF  
■ CSASGTSGGATDTQYF  
■ CASRTSGNTGELFF  
■ CASSDYSNQPQHF  
■ CASSPGTGSNEKLFF  
■ CASSFGTGSSYNSPLHF  
■ CASSPSGGGGETQYF  
■ CAISGGGTDQYF  
■ CASSRDRGRAGELFF  
■ CASSRGNYEYF  
■ CASSRDRGFSYEQYF  
■ CASSLGQGRTGELFF  
■ CASSVYNEQFF

■ CSASGGAYEQYF  
■ CASSSGTPNYGYTF  
■ CASSLVPYEQYF  
■ CASSLQGGDGYTF  
■ CASSLVGSGANVLTF  
■ CASSPGTSGAYEQYF  
■ CASSLGLEQYF  
■ CASSFRGEQYF  
■ CAWSGGNEKLFF  
■ CASSLRLAADTQYF  
■ CASSIDLGTDTQYF  
■ CASSLLHEQYF  
■ CSAREGGYEQYF  
■ CASSLWSSGANVLTF  
■ CASSQQGGTEAFF  
■ CASSPGTSSYEQYF  
■ CASSLGGEQFF  
■ CASSLGSTNEKLFF  
■ CASSLGTSGRETQYF  
■ CASSLLGDEQYF  
■ CASSVGGGQETQYF  
■ CASSYPGETQYF  
■ CASSPDRNTGELFF  
■ CASSQDLDTQYF  
■ CASRQGAGELFF  
■ CASSLGGGYNQFF  
■ CASSVASGGYNEQFF  
■ CASSLKGNEQFF
